# Supplementary material for: Controlled Delivery of Pan-PAD-Inhibitor Cl-Amidine Using Poly(3-Hydroxybutyrate) Microspheres
Source: MDPI journal article supplement (doi:10.3390/ijms222312852), 2021-11-27
Supplement: s1 [file s1]

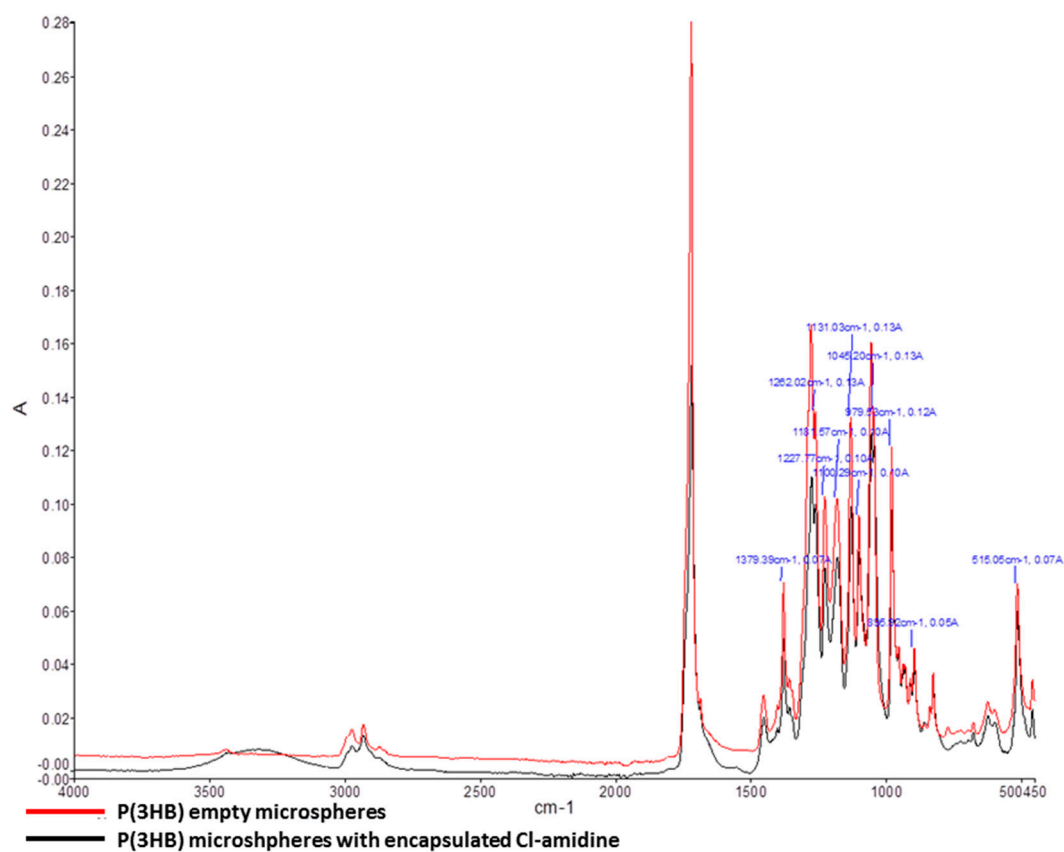

**Figure S1.** Overlay FTIR of empty and Cl-amidine encapsulated P(3HB) microspheres. The red line represents empty P(3HB) microspheres and the black line represents P(3HB) microspheres with encapsulated Cl-amidine.

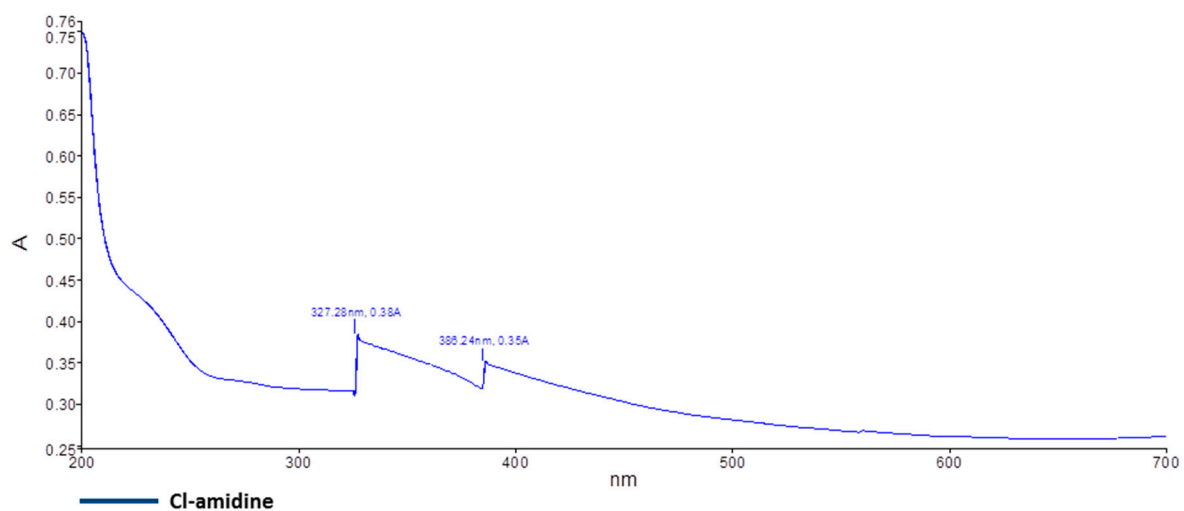

**Figure S2.** Cl-amidine absorption spectrum was used to detect its wave-length of maximum absorbance (327 nm) required for further testing using UV-spectrophotometry.
